# Supplementary material for: Selection of validated hypervariable regions is crucial in 16S-based microbiota studies of the female genital tract
Source: PubMed Central journal article supplement (PMC6018735; doi:10.1038/s41598-018-27757-8), 2018-06-26
Supplement: 41598_2018_27757_MOESM1_ESM.pdf [file 41598_2018_27757_MOESM1_ESM.pdf]

Selection of validated hypervariable regions is crucial in 16S-based microbiota studies of the female genital tract

Simon Graspentner<sup>a</sup>, Nathalie Loeper<sup>a</sup>, Sven Künzel<sup>b</sup>, John F. Baines<sup>b,c</sup>, Jan Rupp<sup>a,d\*</sup>

<sup>a</sup>Department of Infectious Diseases and Microbiology, University of Luebeck, 23538 Luebeck, Germany

<sup>b</sup>Max Planck Institute for Evolutionary Biology, 24306 Ploen, Germany

<sup>c</sup>Institute for Experimental Medicine, Christian-Albrechts-University of Kiel, 24105 Kiel, Germany

<sup>d</sup>German Center for Infection Research (DZIF), partner site Hamburg-Luebeck-Borstel, Germany

Running title: 16S region in female genital tract microbiota studies

\*Corresponding author:

Jan Rupp, MD  
Department of Infectious Diseases and Microbiology  
University Hospital Schleswig-Holstein/ Campus Luebeck  
University of Luebeck  
Ratzeburger Allee 160  
23538 Luebeck, Germany  
Tel.: +49 (0)451/ 500- 45300  
Fax.: +49 (0)451/ 500- 45304  
e-mail: [Jan.Rupp@uksh.de](mailto:Jan.Rupp@uksh.de)

**Supplementary Table S1: Relative read count according to Figure 1**

| Taxon                                   | V1V2   | V3V4   | p-value |
|-----------------------------------------|--------|--------|---------|
| <i>Lactobacillus iners</i>              | 29.724 | 31.115 | 0.726   |
| <i>Lactobacillus crispatus</i>          | 32.929 | 27.256 | 0.390   |
| <i>Gardnerella vaginalis</i>            | 0.054  | 17.646 | 0.000   |
| <i>Lactobacillus gasseri</i>            | 9.386  | 6.432  | 0.413   |
| <i>Aerococcus christensenii</i>         | 4.171  | 1.109  | 0.789   |
| <i>Staphylococcus cluster47</i>         | 2.177  | 2.003  | 0.855   |
| <i>Streptococcus agalactiae</i>         | 2.706  | 1.243  | 0.483   |
| <i>Haemophilus piscium</i>              | 1.374  | 1.487  | 0.923   |
| <i>Ureaplasma cluster23</i>             | 2.017  | 0.303  | 0.199   |
| <i>Bifidobacterium bifidum</i>          | 0.013  | 2.032  | 0.308   |
| <i>Streptococcus cluster29</i>          | 1.238  | 0.707  | 0.174   |
| <i>Pseudomonas gessardii</i>            | 1.862  | 0.020  | 0.000   |
| <i>Atopobium vaginae</i>                | 1.169  | 0.633  | 0.469   |
| <i>Prevotella cluster2</i>              | 0.992  | 0.495  | 0.624   |
| <i>Lactobacillus jensenii</i>           | 1.386  | 0.001  | 0.012   |
| <i>Dialister microaerophilus</i>        | 0.839  | 0.486  | 0.462   |
| <i>Prevotella bivia</i>                 | 0.782  | 0.312  | 0.820   |
| <i>Yersinia intermedia_kristensenii</i> | 0.000  | 0.616  | 0.000   |
| <i>Chlamydia trachomatis</i>            | 0.000  | 0.567  | 0.022   |
| <i>Megasphaera elsdenii</i>             | 0.545  | 0.001  | 0.043   |
| Others                                  | 6.637  | 5.539  | NA      |

**Supplementary Table S2: Community state types of *C. trachomatis* positive samples according to the different regions**

| Sample | CST V1/V2 | CST V3/V4 |
|--------|-----------|-----------|
| B048   | div       | Lin       |
| B044   | div       | div       |
| B074   | div       | Gva1      |
| B087   | div       | Gva1      |

**Supplementary Table S3: Indicator species analysis<sup>#</sup> for *C. trachomatis* positive samples using the V1/V2 region**

| V1/V2                                          | A*     | B**  | p-value |
|------------------------------------------------|--------|------|---------|
| <b>Streptococcus(100);cluster29(100);</b>      | 0.97   | 0.75 | 0.02    |
| <b>Staphylococcus(100);cluster47(100);</b>     | 0.93   | 0.75 | 0.03    |
| <b>Veillonella(100);montpellierensis(100);</b> | 0.83   | 0.75 | 0.01    |
| <b>Megasphaera(100);elsdenii(100);</b>         | 0.71   | 0.75 | 0.005   |
| <b>Granulicatella(100);elegans(100);</b>       | 1.00   | 0.5  | 0.01    |
| <b>Haemophilus(100);parainfluenzae(100);</b>   | 0.99   | 0.5  | 0.01    |
| <b>Lachnospiraceae(100);BVAB1(100);</b>        | 0.99   | 0.5  | 0.015   |
| <b>Fusobacterium(100);cluster48(100);</b>      | 0.98   | 0.5  | 0.02    |
| <b>Prevotella(100);amnii(100);</b>             | 0.89   | 0.5  | 0.03    |
| <b>Sneathia(100);sanguinegens(100);</b>        | 0.84   | 0.5  | 0.03    |
| <b>Eggerthella(100);sinensis(100);</b>         | 0.78   | 0.5  | 0.04    |
| <b>Ureaplasma(100);cluster23(100);</b>         | 0.8255 | 0.75 | 0.025   |
| <b>Atopobium(100);vaginae(100);</b>            | 0.8053 | 0.5  | 0.045   |

<sup>#</sup>Indicator species analysis shows the taxa which are significantly associated with infection status (i.e. associated with samples that were tested positive for *C. trachomatis* as outlined in Table 1).

\*: ratio of total number reads of the respective taxon appearing in the *C. trachomatis* positive samples.

\*\* : ratio of samples displaying reads of the respective taxon.

**Supplementary Table S4: Indicator species analysis<sup>#</sup> for *C. trachomatis* positive samples using the V3/V4 region**

| V3/V4                                                         | A*   | B**  | p-value |
|---------------------------------------------------------------|------|------|---------|
| <b>Chlamydia(100);trachomatis(100);</b>                       | 1.00 | 1    | 0.005   |
| <b>Streptococcus(100);cluster29(100);</b>                     | 0.99 | 0.75 | 0.005   |
| <b>Veillonella(100);montpellierensis(100);</b>                | 0.98 | 0.75 | 0.005   |
| <b>Sutterella(100);sanguinis(100);</b>                        | 0.93 | 0.75 | 0.01    |
| <b>Atopobium(100);vaginae(100);</b>                           | 0.93 | 0.75 | 0.02    |
| <b>Ureaplasma(100);cluster23(100);</b>                        | 0.88 | 0.75 | 0.035   |
| <b>Dialister(100);propionificiens(100);</b>                   | 0.70 | 0.75 | 0.03    |
| <b>Granulicatella(100);elegans(100);</b>                      | 1.00 | 0.5  | 0.005   |
| <b>Lachnospiraceae(100);BVAB1(100);</b>                       | 0.98 | 0.5  | 0.03    |
| <b>Haemophilus(100);parainfluenzae(100);</b>                  | 0.95 | 0.5  | 0.015   |
| <b>Prevotella(100);amnii(100);</b>                            | 0.91 | 0.5  | 0.045   |
| <b>Mycoplasma(100);hominis(100);</b>                          | 0.86 | 0.5  | 0.035   |
| <b>Delftia(100);acidovorans_lacustris_tsuruhatensis(100);</b> | 0.69 | 0.5  | 0.05    |
| <b>Clostridiales(100);BVAB2(100);</b>                         | 0.53 | 0.5  | 0.05    |

<sup>#</sup>Indicator species analysis shows the taxa which are significantly associated with infection status (i.e. associated with samples that were tested positive for *C. trachomatis* as outlined in Table 1).

\*: ratio of total number reads of the respective taxon appearing in the *C. trachomatis* positive samples.

\*\* : ratio of samples displaying reads of the respective taxon.

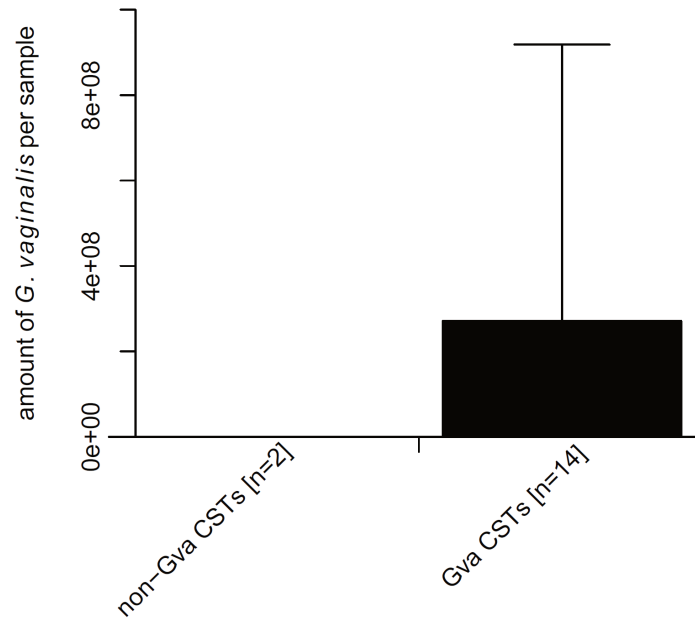

**Supplementary Figure S1: The Gva CSTs contain a considerable amount of *G. vaginalis*.** We performed qPCR detection of *G. vaginalis* in a subset of samples. Thus, we could prove the presence of *G. vaginalis* in all samples with a Gva CST. We further tested two samples which were negative for *G. vaginalis* reads in the sequencing and they were negative in the qPCR as well.
